# Supplementary figures and images for: NGSANE: a lightweight production informatics framework for high-throughput data analysis
Source: PubMed Central journal article supplement — Bioinformatics. 2014 Jan 26;30(10):1471–2. doi: 10.1093/bioinformatics/btu036 (PMC4016703; doi:10.1093/bioinformatics/btu036), 2014-01-26

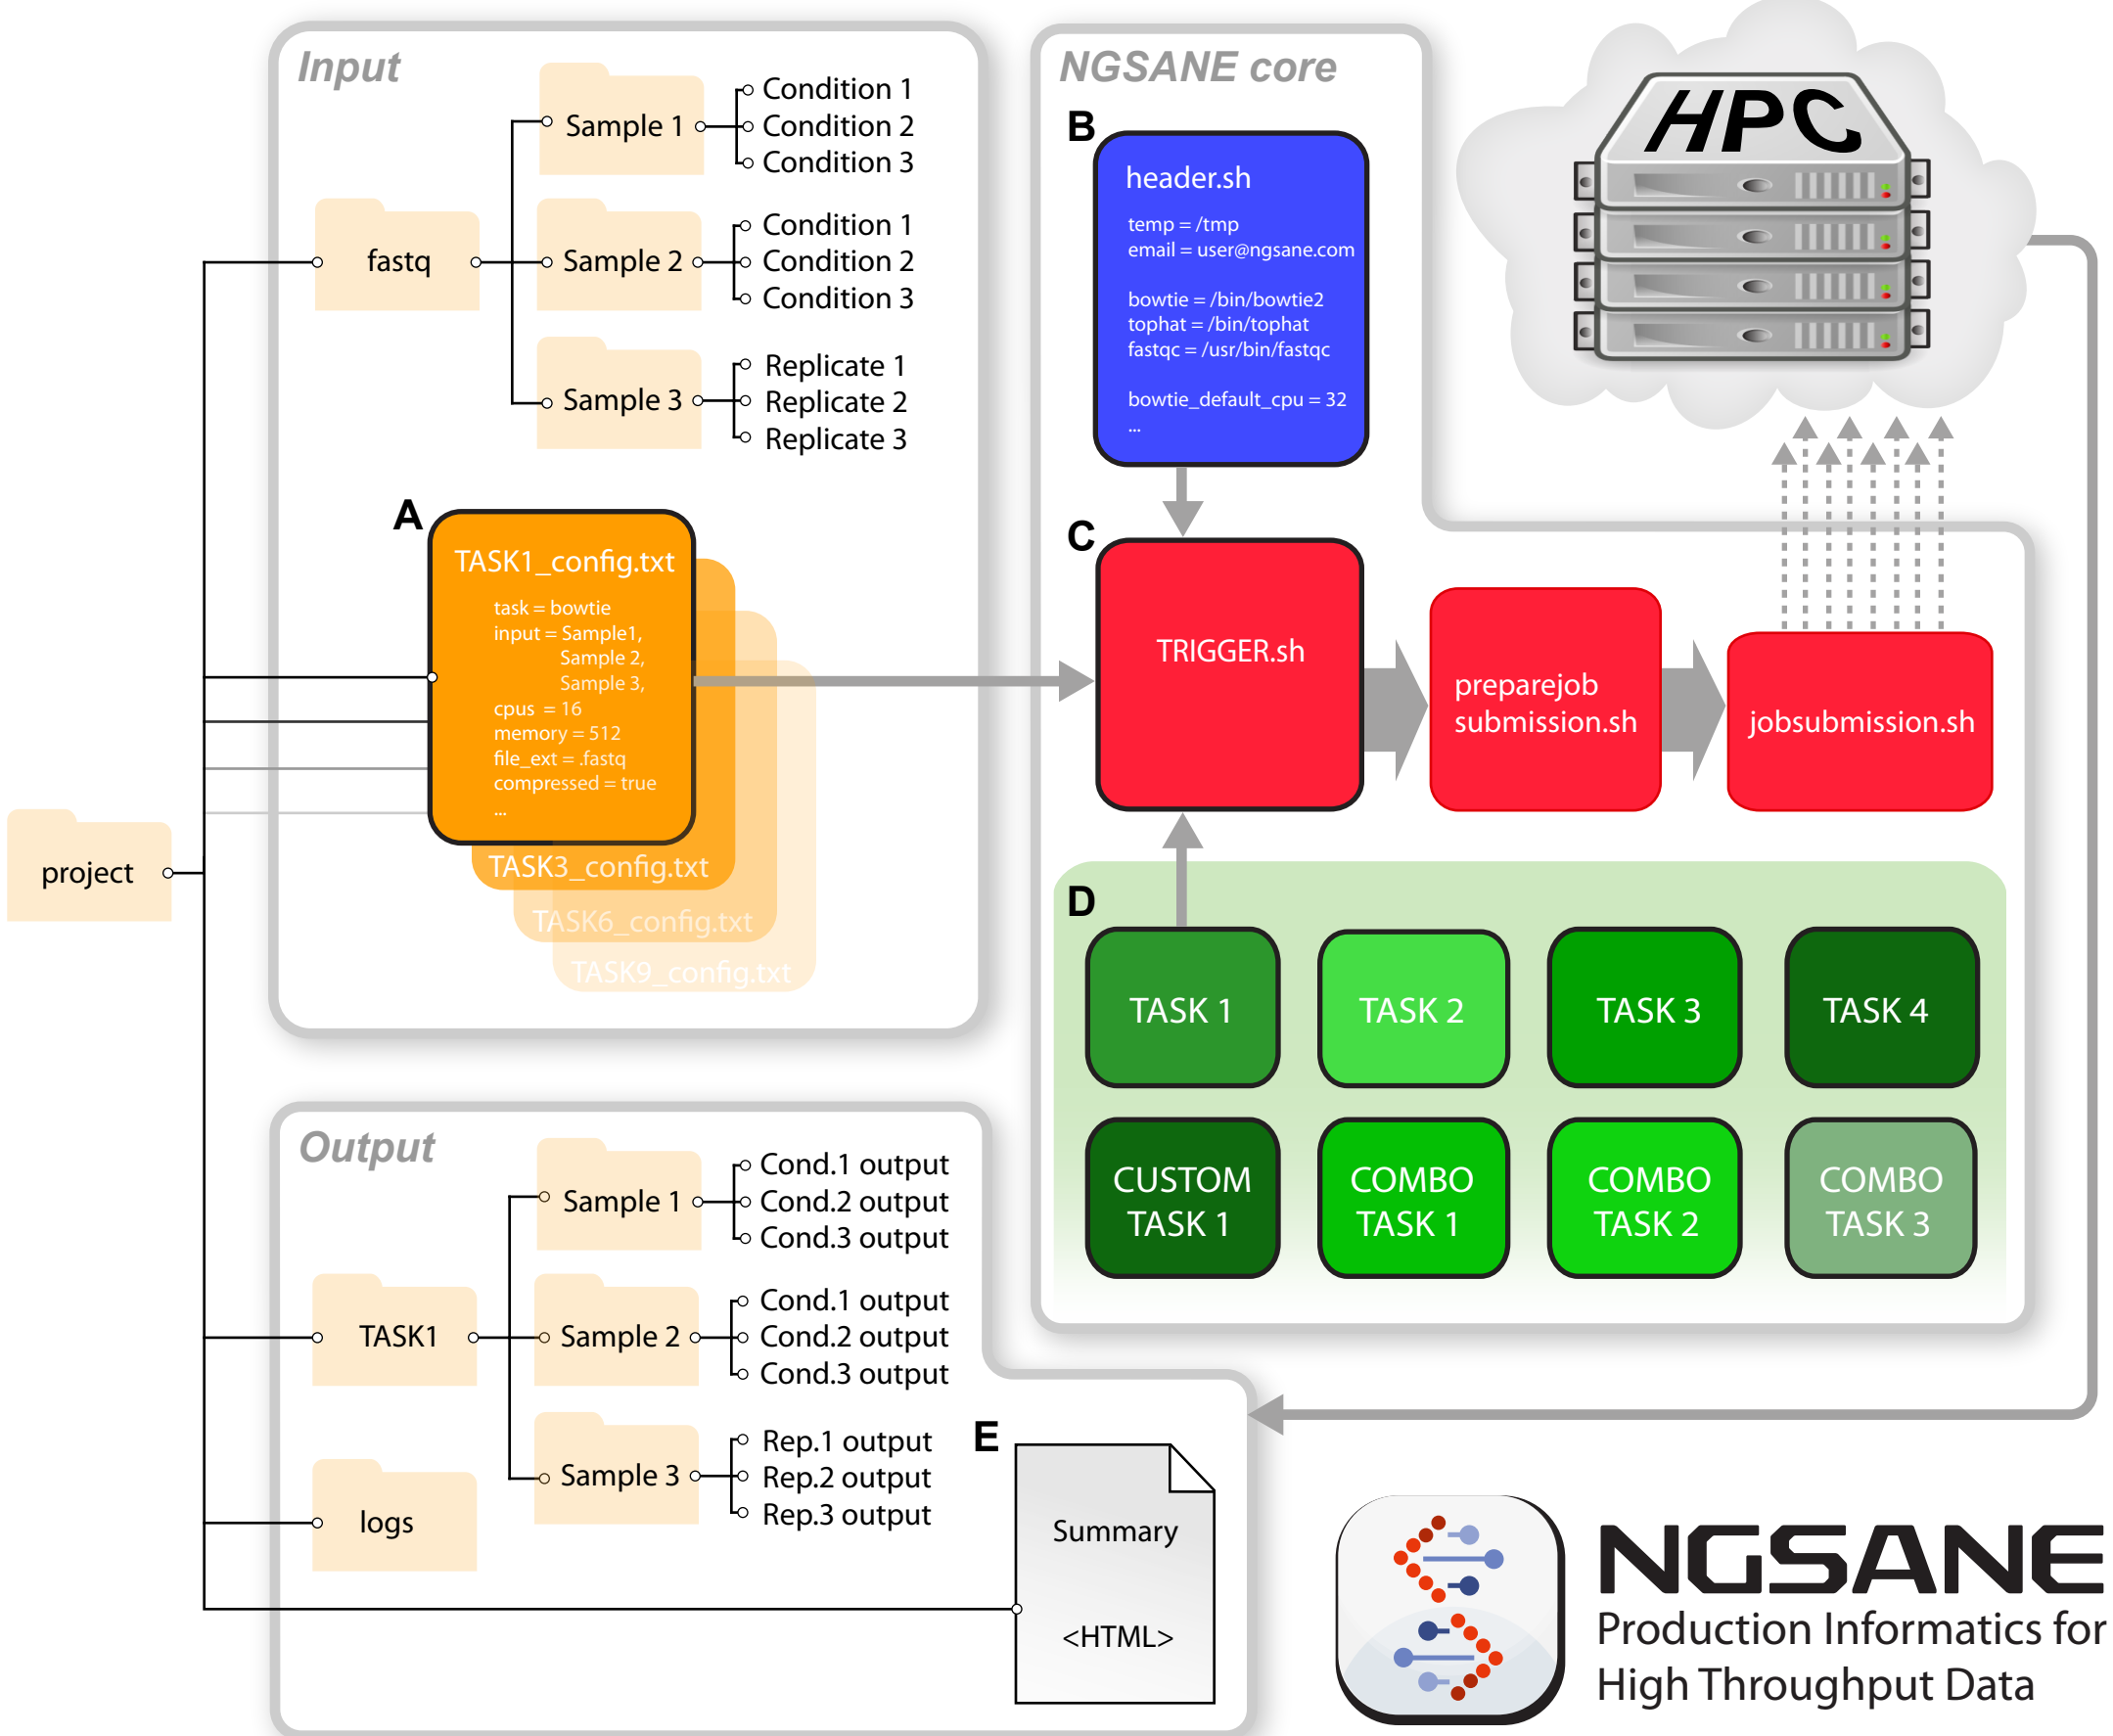

Supplement: supp_btu036_btu036supplement_overview.pdf [file supp_btu036_btu036supplement_overview.pdf]
